# Supplementary material for: Experimental and theoretical studies on solvation in aqueous solutions of ionic liquids carrying different side chains: the n-butyl-group versus the methoxyethyl group
Source: Royal Society of Chemistry journal article supplement (doi:10.1039/c7ra00273d), 2017-01-01
Supplement: c7ra00273d1.pdf [file c7ra00273d1.pdf]

Electronic Supplementary Information for

**Experimental and theoretical studies on solvation in aqueous solutions of ionic liquids carrying different side chains: The *n*-butyl- versus the methoxyethyl group**

Jéssica C. de Jesus,<sup>1</sup> Paulo A. R. Pires,<sup>1</sup> Rizwana Mustafa,<sup>2</sup> Naheed Riaz,<sup>2</sup>  
and Omar A. El Seoud<sup>1,\*</sup>

1- Institute of Chemistry, the University of São Paulo  
748 Professor Lineu Prestes Av., 05508-000 São Paulo, SP, Brazil; e-mail:  
elseoud@usp.br

2- Department of Chemistry, the University of Bahawalpur,  
Bahawalpur 63100, Pakistan

**Table ESI-1:** <sup>1</sup>H NMR chemical shifts ( $\delta$ , ppm) for the ionic liquids 1-(1-butyl)-3-methylimidazolium chloride, C<sub>4</sub>MeImCl, 1-(2-methoxyethyl)-3-methylimidazolium chloride, C<sub>3</sub>OMeImCl, and their respective acetates (500 MHz; CDCl<sub>3</sub>).<sup>a</sup>

| 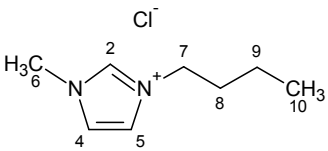 |                                   |  |  |  |  |  |  |
|------------------------------------------------------------------------------------|-----------------------------------|------------------------------------------------------------------------------------|--|-------------------------------------------------------------------------------------|--|--------------------------------------------------------------------------------------|--|
| <b>C<sub>4</sub>MeImCl</b>                                                         |                                   | <b>C<sub>3</sub>OMeImCl</b>                                                        |  | <b>C<sub>4</sub>MeImAc</b>                                                          |  | <b>C<sub>3</sub>OMeImAc</b>                                                          |  |
| <b>Hydrogen</b>                                                                    | <b>(<math>\delta</math>, ppm)</b> | <b>(<math>\delta</math>, ppm)</b>                                                  |  | <b>(<math>\delta</math>, ppm)</b>                                                   |  | <b>(<math>\delta</math>, ppm)</b>                                                    |  |
| H11                                                                                | -                                 | -                                                                                  |  | 2.00(s)                                                                             |  | 2.00(s)                                                                              |  |
| H10                                                                                | 0.96(t)                           | 3.37(s)                                                                            |  | 0.96(t)                                                                             |  | 3.36(s)                                                                              |  |
| H9                                                                                 | 1.39(m)                           | -                                                                                  |  | 1.38(m)                                                                             |  | -                                                                                    |  |
| H8                                                                                 | 1.91(m)                           | 3.78(t)                                                                            |  | 1.87(m)                                                                             |  | 3.74(t)                                                                              |  |
| H7                                                                                 | 4.34(t)                           | 4.60(t)                                                                            |  | 4.30(t)                                                                             |  | 4.54(t)                                                                              |  |
| H6                                                                                 | 4.13(s)                           | 4.11(s)                                                                            |  | 4.06(s)                                                                             |  | 4.02(s)                                                                              |  |
| H5                                                                                 | 7.68(t)                           | 7.61(t)                                                                            |  | 7.27(s)                                                                             |  | 7.37(s)                                                                              |  |
| H4                                                                                 | 7.53(t)                           | 7.60(t)                                                                            |  | 7.22(s)                                                                             |  | 7.19(s)                                                                              |  |
| H2                                                                                 | 10.53(s)                          | 10.40(s)                                                                           |  | 11.25(s)                                                                            |  | 10.89(s)                                                                             |  |

a-Bruker DRX-500 NMR spectrometer. <sup>1</sup>H NMR peak multiplicities (m, s, t) refer to multiplet, singlet, and triplet, respectively.

**Table ESI-2-** Compositions of the systems simulated by molecular dynamics.<sup>a,b</sup>

| System                | Number of IL molecules | Number of W molecules <sup>c</sup> | $\chi_w^d$ | System                 | Number of IL molecules | Number of W molecules <sup>c</sup> | $\chi_w^d$ |
|-----------------------|------------------------|------------------------------------|------------|------------------------|------------------------|------------------------------------|------------|
| C <sub>4</sub> MeImAc |                        |                                    |            | C <sub>3</sub> OMeImAc |                        |                                    |            |
| A1                    | 670                    | 330                                | 0.33       | A2                     | 670                    | 330                                | 0.33       |
| B1                    | 330                    | 670                                | 0.67       | B2                     | 330                    | 670                                | 0.67       |
| C <sub>4</sub> MeImCl |                        |                                    |            | C <sub>3</sub> OMeImCl |                        |                                    |            |
| C1                    | 330                    | 670                                | 0.67       | C2                     | 330                    | 670                                | 0.67       |

- a- All simulations refer to WB in IL-Ac-W mixtures; the number of WB molecules was 20.
- b- Acronyms for the ILs: C<sub>4</sub>MeImAc, 1-(n-butyl)-3-methylimidazolium acetate; C<sub>4</sub>MeImCl, 1-(n-butyl)-3-methylimidazolium chloride; C<sub>3</sub>OMeImAc; 1-(methoxyethyl)-3-methylimidazolium acetate; C<sub>3</sub>OMeImCl; 1-(methoxyethyl)-3-methylimidazolium chloride.
- c- We employed SPC/E model of W molecules.<sup>(42)</sup>
- d-  $\chi_w$  is water mole fraction in the simulated mixture.

#### ***Molar concentration in the simulation boxes***

The number of molecules listed in Table ESI-2 above correspond to the following concentrations (in mol L<sup>-1</sup>) for WB, IL and W, respectively, for the following systems: (A1): 0.27, 4.45, and 9.04; (A2): 0.26, 4.22, and 8.57; (B1): 0.16, 5.26, and 2.59; (B2): 0.15, 4.91, and 2.42; (C1): 0.28, 4.70, and 9.54 and (C2): 0.27, 4.42, and 8.98. The concentrations were calculated based on box volumes (in nm<sup>3</sup>) of 123.048 (A1), 129.798 (A2), 211.617 (B1), 226.397 (B2), 116.591 (C1) and 123.846 (system C2).

#### ***Dependence of $E_T(WB)$ on the composition of the binary solvent mixture***

**Table ESI-3-** Polynomial dependence of  $E_T(WB)$  on the analytical mole fraction of water ( $\chi_w$ ) at different temperatures. <sup>a</sup>

$$E_T(\text{WB}) = A + B(\chi_w) + C(\chi_w)^2 + D(\chi_w)^3 + E(\chi_w)^4 + F(\chi_w)^5 + G(\chi_w)^6$$

#### C<sub>4</sub>MeImAc

| T, °C | A       | B       | C        | D        | E        | F        | G        | r <sup>2</sup> | ΣQ <sup>2</sup> |
|-------|---------|---------|----------|----------|----------|----------|----------|----------------|-----------------|
| 15    | 59.8324 | -9.5182 | 180.0520 | -866.723 | 1843.639 | -1796.54 | 659.3602 | 0.99321        | 0.68674         |
| 25    | 59.4775 | -4.4441 | 139.2435 | -738.810 | 1657.185 | -1668.85 | 626.0020 | 0.99541        | 0.45627         |
| 40    | 59.1703 | -3.3346 | 90.8191  | -486.534 | 1150.271 | -1221.37 | 480.1549 | 0.99185        | 0.78838         |
| 60    | 58.6134 | -3.3352 | 120.1905 | -617.993 | 1343.067 | -1317.12 | 485.0922 | 0.99488        | 0.49029         |

#### C<sub>3</sub>OMeImAc

| T, °C | A       | B      | C        | D        | E         | F        | G        | r <sup>2</sup> | ΣQ <sup>2</sup> |
|-------|---------|--------|----------|----------|-----------|----------|----------|----------------|-----------------|
| 15    | 59.5891 | 3.6597 | -19.4024 | 72.9841  | -112.1493 | 74.8720  | -9.0624  | 0.99930        | 0.09997         |
| 25    | 59.5371 | 0.8858 | -6.6316  | 57.1122  | -124.1659 | 109.3973 | -26.0698 | 0.99907        | 0.12710         |
| 40    | 59.0883 | 4.4955 | -33.1494 | 136.3334 | -237.7854 | 186.8840 | -46.3893 | 0.99935        | 0.08426         |
| 60    | 58.8036 | 1.0996 | -3.0562  | 14.1312  | -4.2232   | -19.6074 | 21.6870  | 0.99865        | 0.16773         |

a- r<sup>2</sup> and ΣQ<sup>2</sup> refer to the nonlinear correlation coefficient and the sum of the squares of the residuals, respectively.

### Calculations

#### Model employed for analysis of the solvatochromic data

We carried out these calculations as detailed previously.<sup>[1,2]</sup> In the following discussion, the probe is WB, dissolved in mixtures of ionic liquid (IL) and water (W). Equation ESI-1 refers to the formation of the IL-W mixed solvent, whereas the solvent exchange equilibria in the solvation layer of WB, whose constants are the fractionation factors, φ are given by Eqns. ESI-2 to ESI-4.

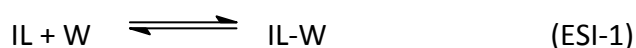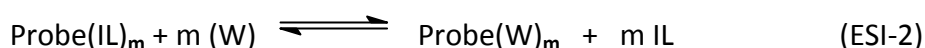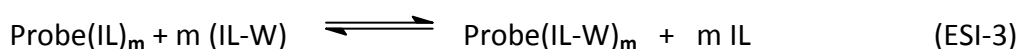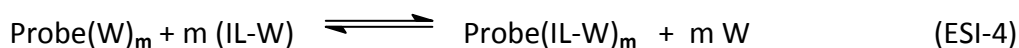

After algebraic manipulation, we obtain the following Eqns. for the calculation of φ:

[4]

$$\varphi_{W/IL} = \frac{x_W^{Probe} / x_{IL}^{Probe}}{(x_W^{Bk;Effective} / x_{IL}^{Bk;Effective})^m} \quad (ESI-5)$$

$$\varphi_{IL-W/IL} = \frac{x_{IL-W}^{Probe} / x_{IL}^{Probe}}{(x_{IL-W}^{Bk;Effective} / x_{IL}^{Bk;Effective})^m} \quad (ESI-6)$$

$$\varphi_{IL-W/W} = \frac{x_{IL-W}^{Probe} / x_W^{Probe}}{(x_{IL-W}^{Bk;Effective} / x_W^{Bk;Effective})^m} \quad (ESI-7)$$

Where the superscripts “probe, BK, and effective” refer to the solvation layer of WB, bulk binary solvent, and effective (or local) concentration of the solvent species, respectively. The meaning of  $\varphi_{W/IL}$ ,  $\varphi_{IL-W/IL}$ , and  $\varphi_{IL-W/W}$  is explained in the main Text. We used Eqns. ESI-8 and ESI-9 to calculate the appropriate ( $\varphi$ ) by iteration:

$$E_T^{Obs} = \chi_W^{Probe} E_T^W + \chi_{IL}^{Probe} E_T^{IL} + \chi_{IL-W}^{Probe} E_T^{IL-W} \quad (ESI-8)$$

$$E_T^{Obs} = \frac{(\chi_{IL}^{Bk;Effective})^m E_T^{IL} + \varphi_{W/IL} (\chi_W^{Bk;Effective})^m E_T^W + \varphi_{IL-W/IL} (\chi_{IL-W}^{Bk;Effective})^m E_T^{IL-W}}{(\chi_{IL}^{Bk;Effective})^m + \varphi_{W/IL} + (\chi_W^{Bk;Effective})^m + \varphi_{IL-W/IL} (\chi_{IL-W}^{Bk;Effective})^m} \quad (ESI-9)$$

The effective concentrations of IL, S, and IL-W are calculated from density data as follows:<sup>[3,4]</sup> we use the density ( $\rho$ ) of the pure solvents, plus IL-W mixtures (eighteen samples in all) to calculate (by iteration) the dissociation constant  $K_{dissoc}$  of the IL-W mixed solvent, according to Eqn. ESI-10. Based on  $K_{dissoc}$  we calculate the effective concentrations of IL, W, IL-W for all binary solvent mixtures employed, and then solve Eqns. ESI-8 and ESI-9 to get the required  $\varphi$ .

We calculate the effective concentrations of the species in the solvent from the dependence of the density ( $\rho$ ) on the volume fraction ( $\phi$ ) of the solvent species:

[5]

$$\rho_{mixt} = \frac{[W]_{Bk;Effective}M_W + [IL]_{Bk;Effective}M_{IL} + [IL - W]_{Bk;Effective}M_{IL - W}}{[W]_{Bk;Effective}V_W + [IL]_{Bk;Effective}V_{IL} + [IL - W]_{Bk;Effective}V_{IL - W}} \quad (\text{ESI-10})$$

Where  $\rho_{mixt}$  refers to the measured density of the binary mixture, M and V refer to the molar mass and molar volume of the solvent. Figure ESI-2 shows examples of the application of Eqn. ESI-10 to our density data; the points are experimental and the lines are calculated by iteration.

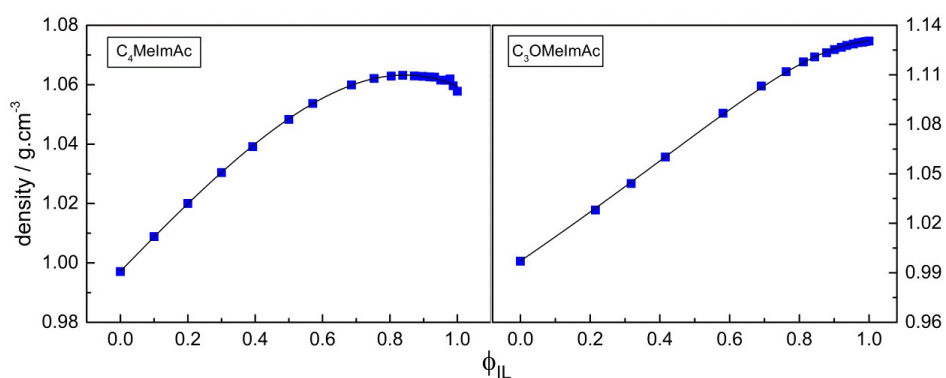

Figure ESI-1: Dependence of the densities on the volume fraction of IL ( $\phi_{IL}$ ) at 25°C. The points are experimental; Eqn. We used Eqn. ESI-10 to calculate the lines.

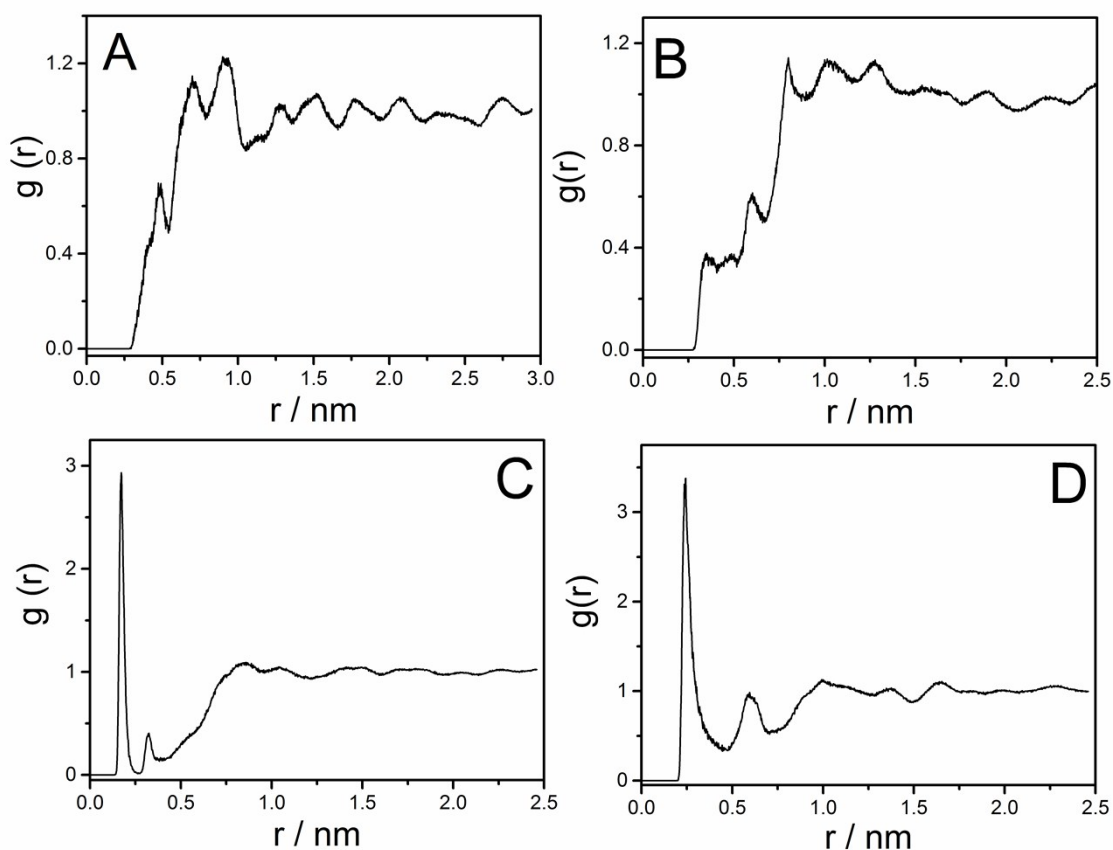

Figure ESI-2. Examples of radial distribution function of pairs of atoms (RDF) between: the pyridinium ( $N^+$ ) of WB and ( $-O-$ ) of  $C_3OMelmAc$  at  $\chi_W=0.33$  (part A); the pyridinium ( $N^+$ ) of WB and ( $-O-$ ) of water at  $\chi_W=0.67$  (part B); the phenolate oxygen of WB and H of water at  $\chi_W=0.67$  (part C); the phenolate oxygen of WB and  $C2-H$  of  $C_4MelmAc$  at  $\chi_W=0.67$  (part C).

Figure ESI-3 shows the dependence of the effective mole fractions of the species present on binary solvent composition.

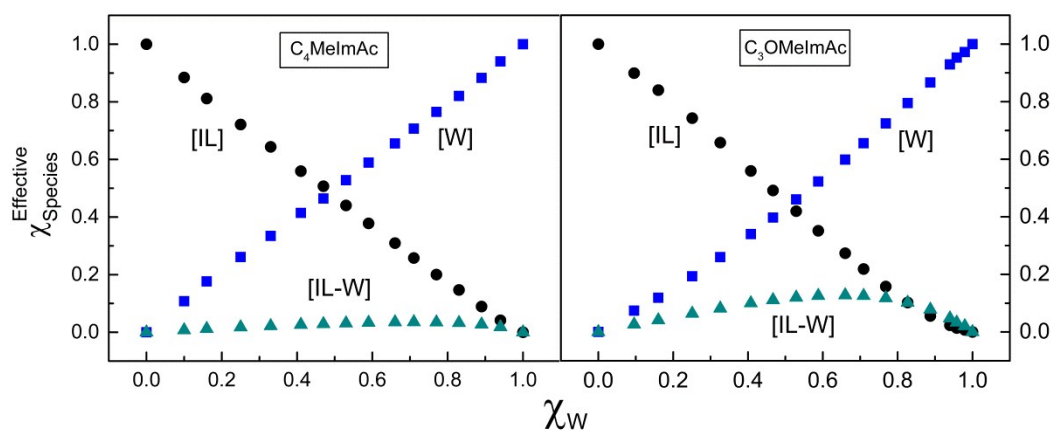

Figure ESI-3: Dependence of the effective concentration of the species in the IL-W binary mixtures on the mole fraction of water,  $\chi_w$  at 25°C.

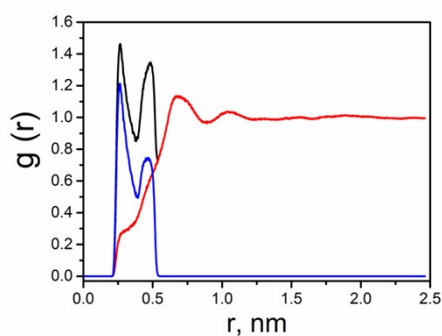

Figure ESI-4. Example of Radial Distribution Function (RDF) between C2-H and (-O-) of  $C_3OMelm^+$ , at  $\chi_w = 0.67$ . Black curve = intra- and intermolecular interactions; red curve = intermolecular interactions; blue curve = intramolecular interactions (difference between the black and red curves).

#### References for ESI

- [1] El Seoud OA. Pure Appl Chem 2007;79:1135–51.
- [2] El Seoud OA. Pure Appl Chem 2009;81:697–707.
- [3] Katz ED, Ogan K, Scott RPW. J Chromatogr A 1986;352:67–90.
- [4] Silva PL, Bastos EL, El Seoud OA. J Phys Chem B 2007;111:6173–80.
